# Supplementary figures and images for: Charge transfer characteristics in rhodopsin mimics during photoexcitation
Source: Royal Society of Chemistry journal article supplement (doi:10.1039/d4cp02970d), 2024-01-01

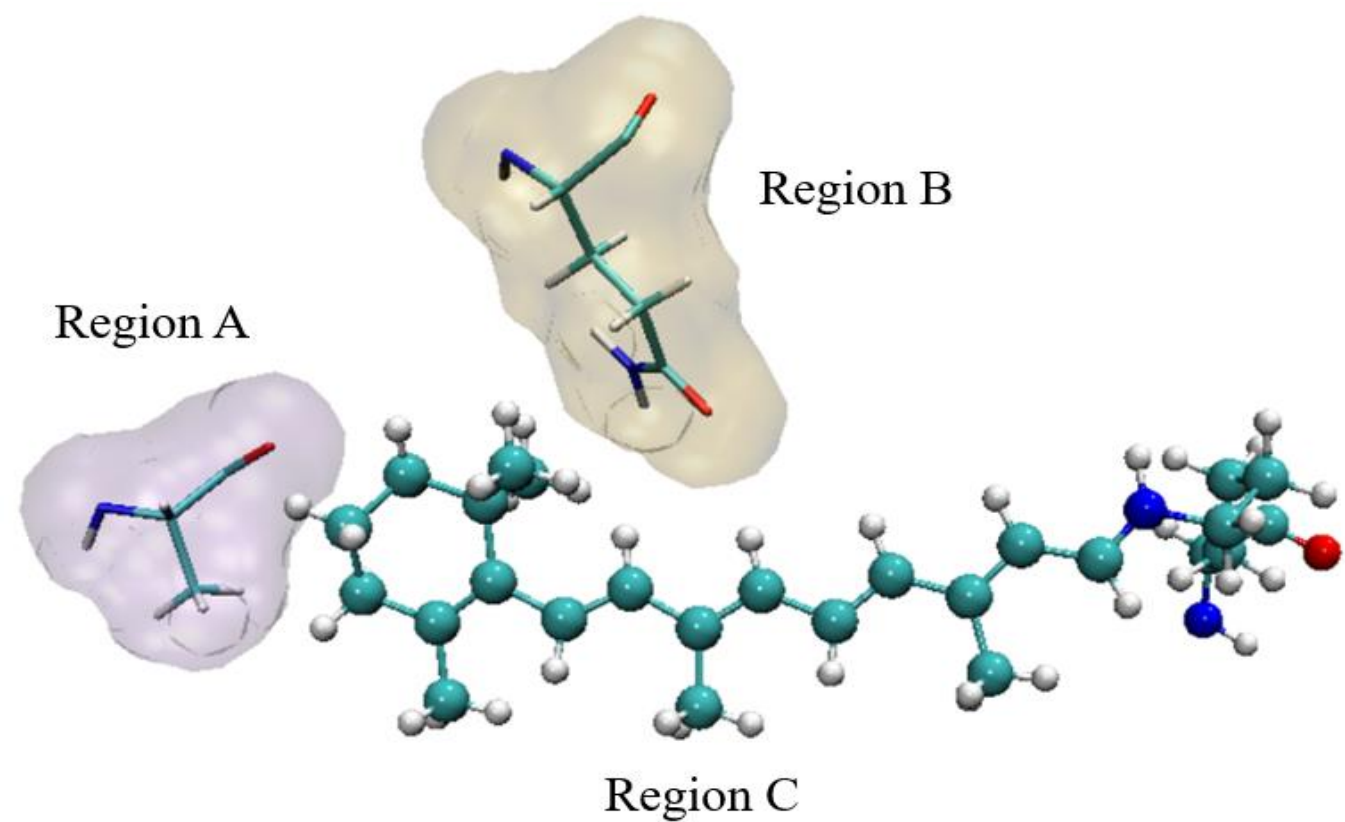

Supplement: d4cp02970d2.pdf [file d4cp02970d2.pdf]

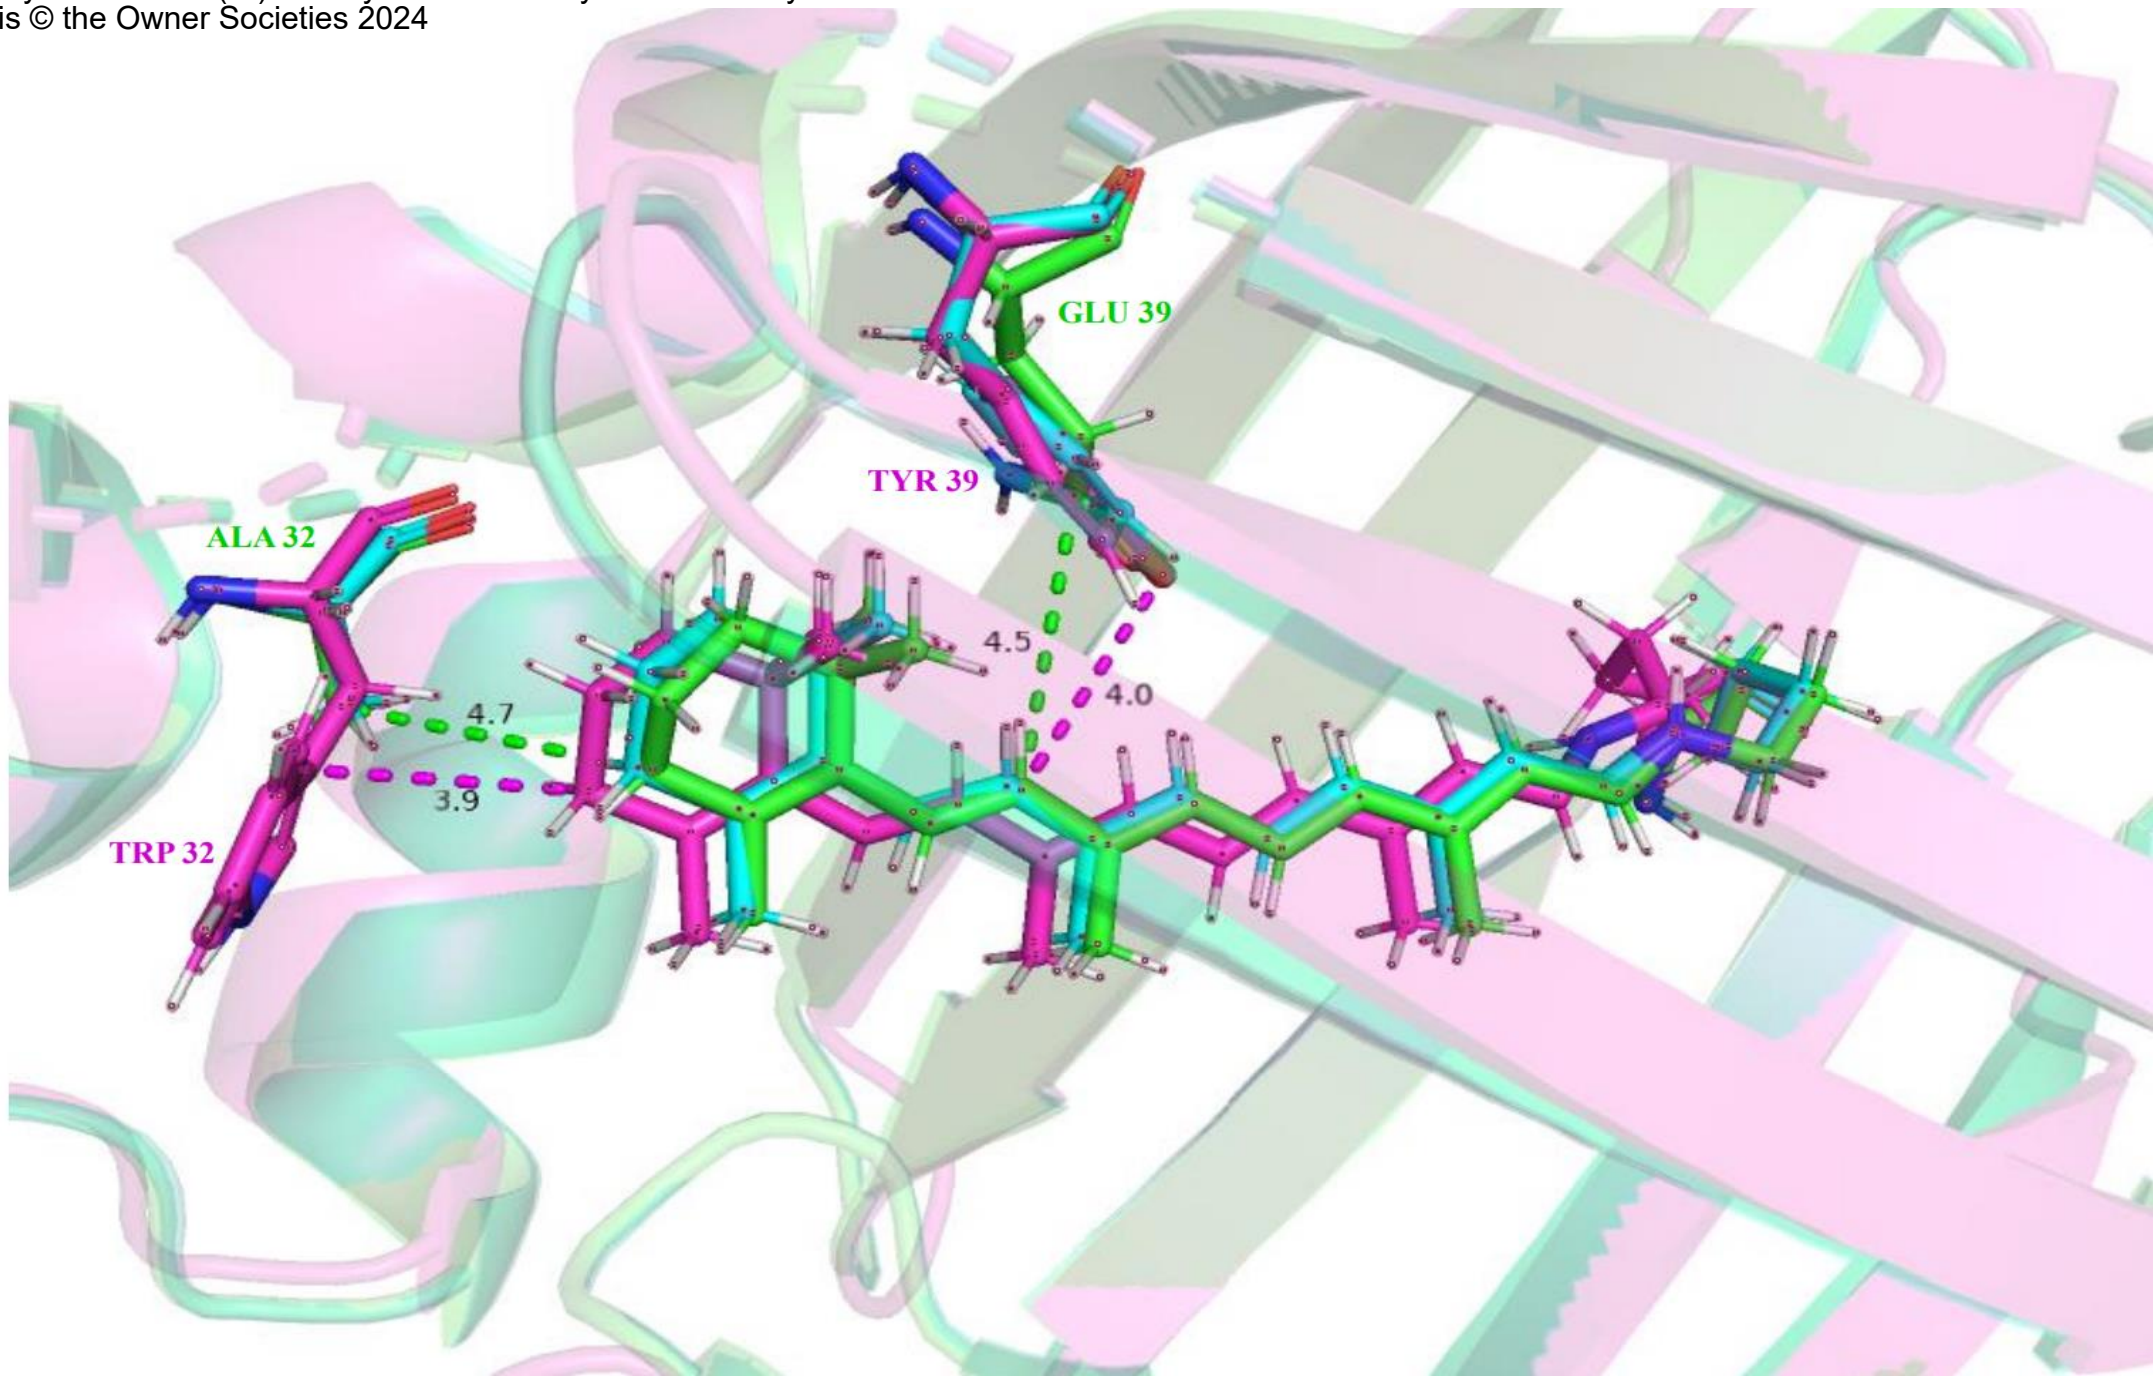

Supplement: d4cp02970d3.pdf [file d4cp02970d3.pdf]

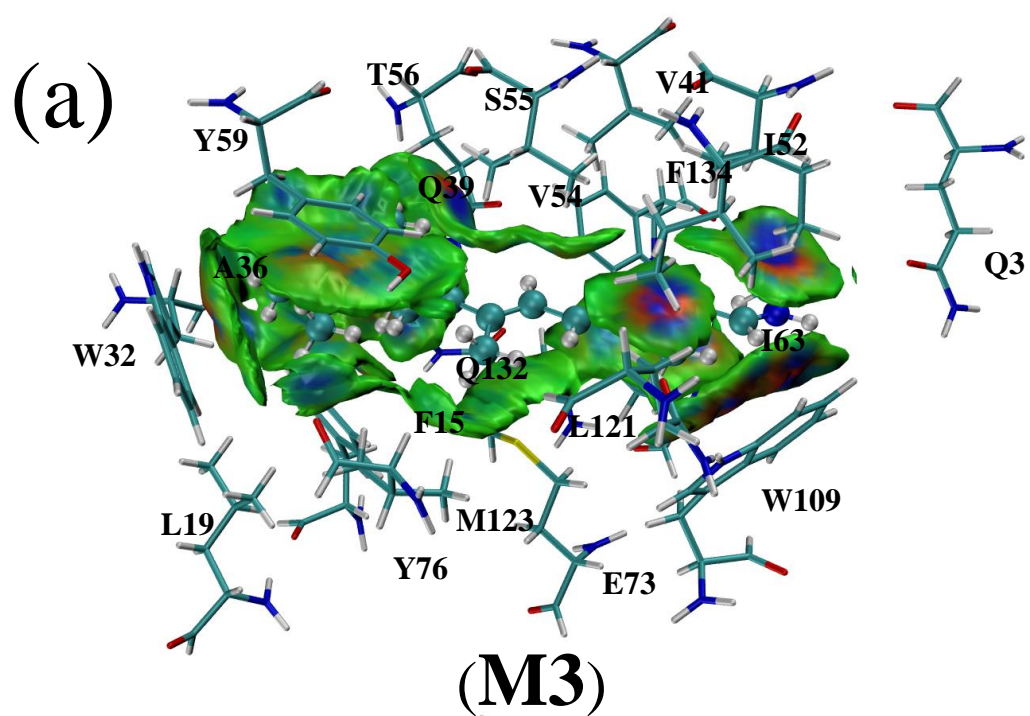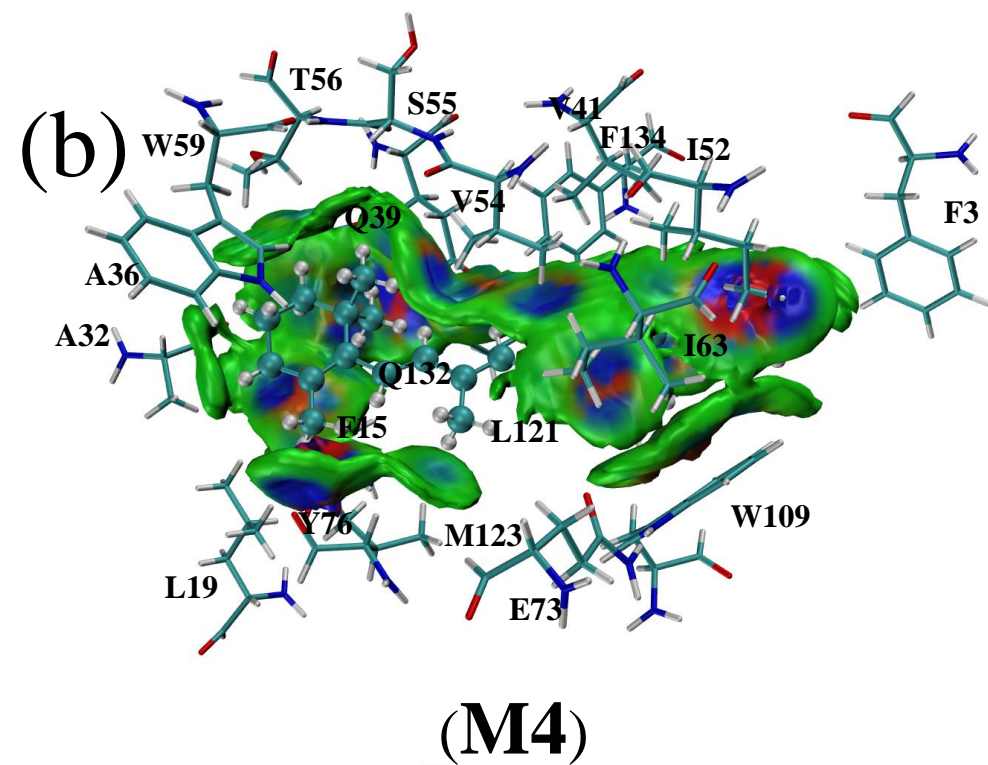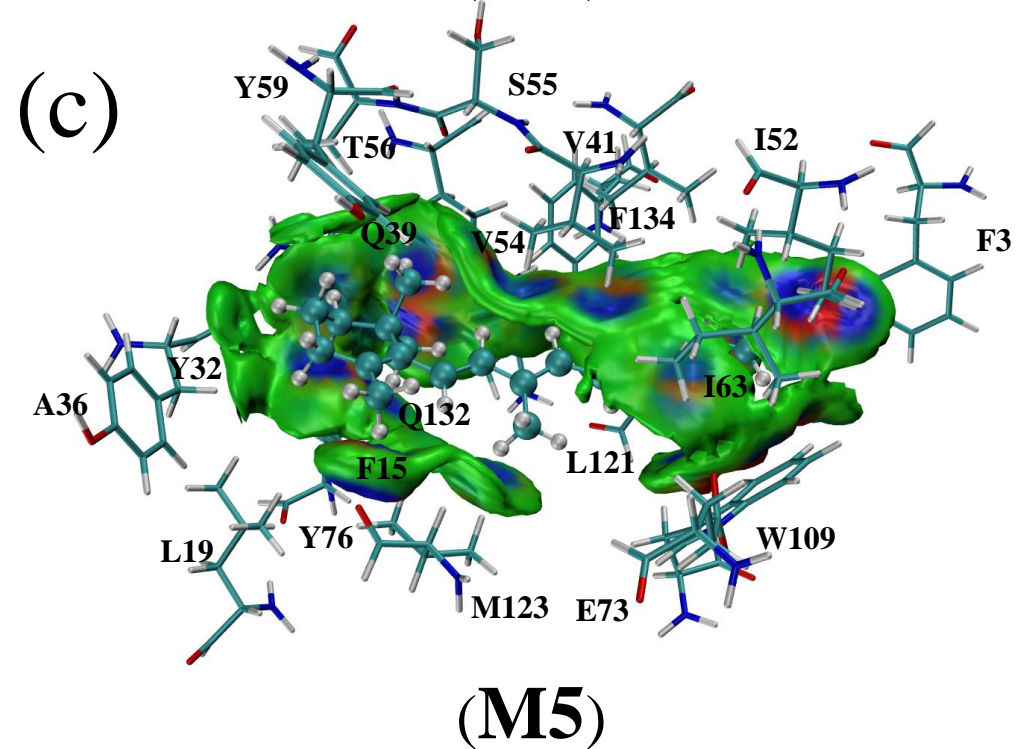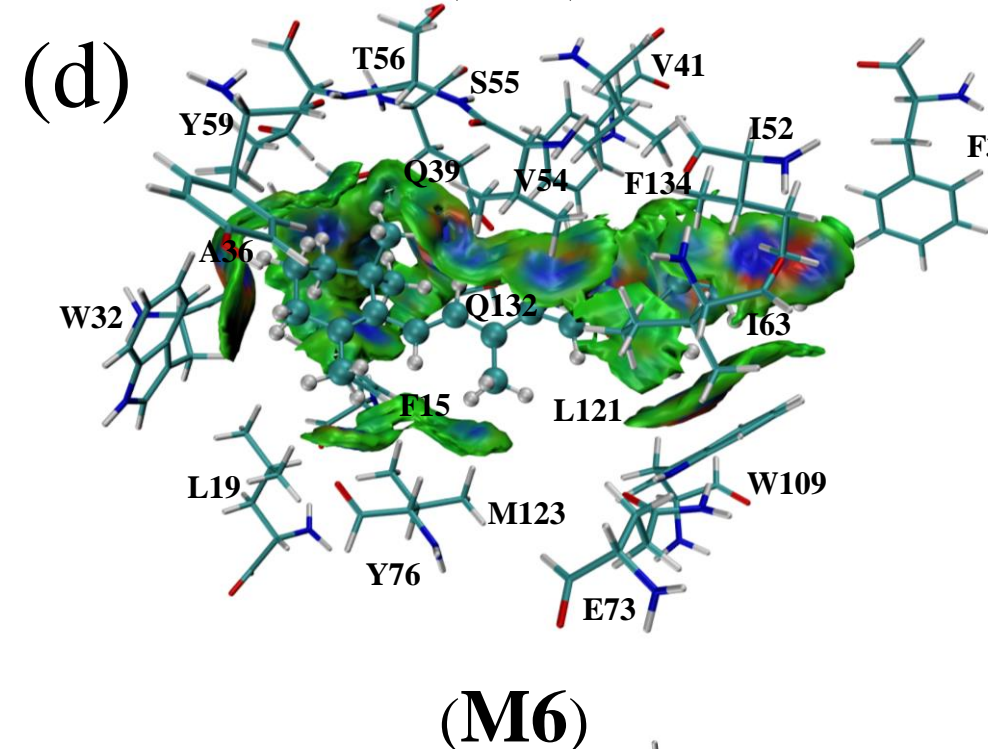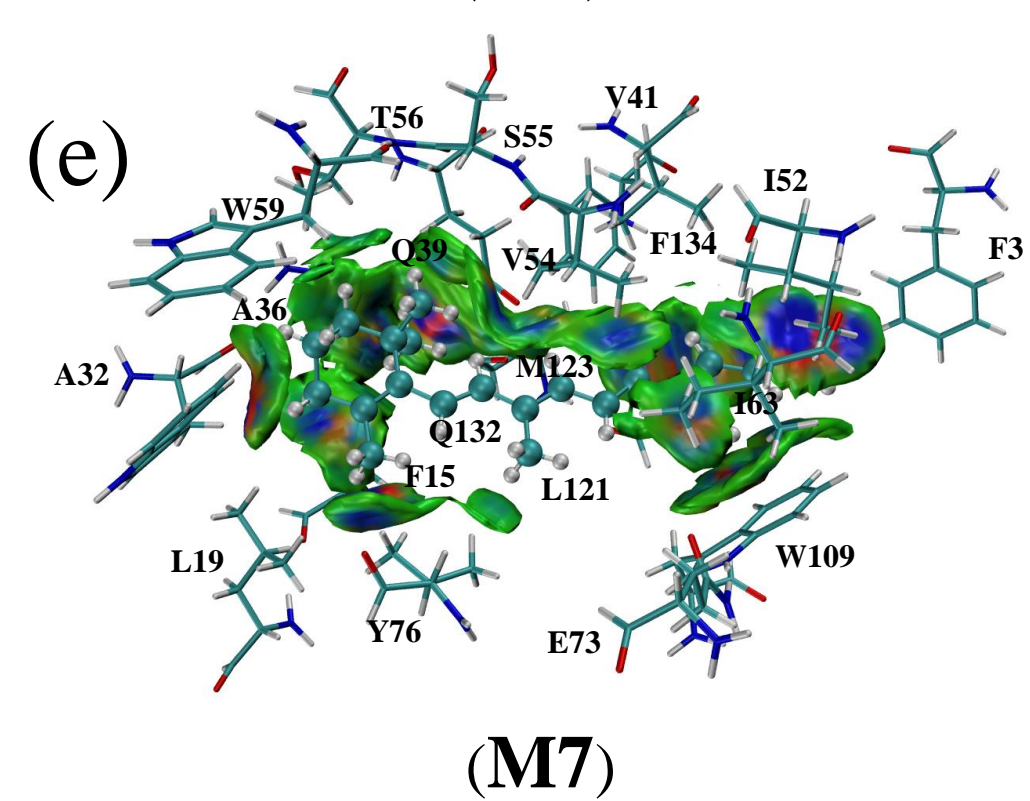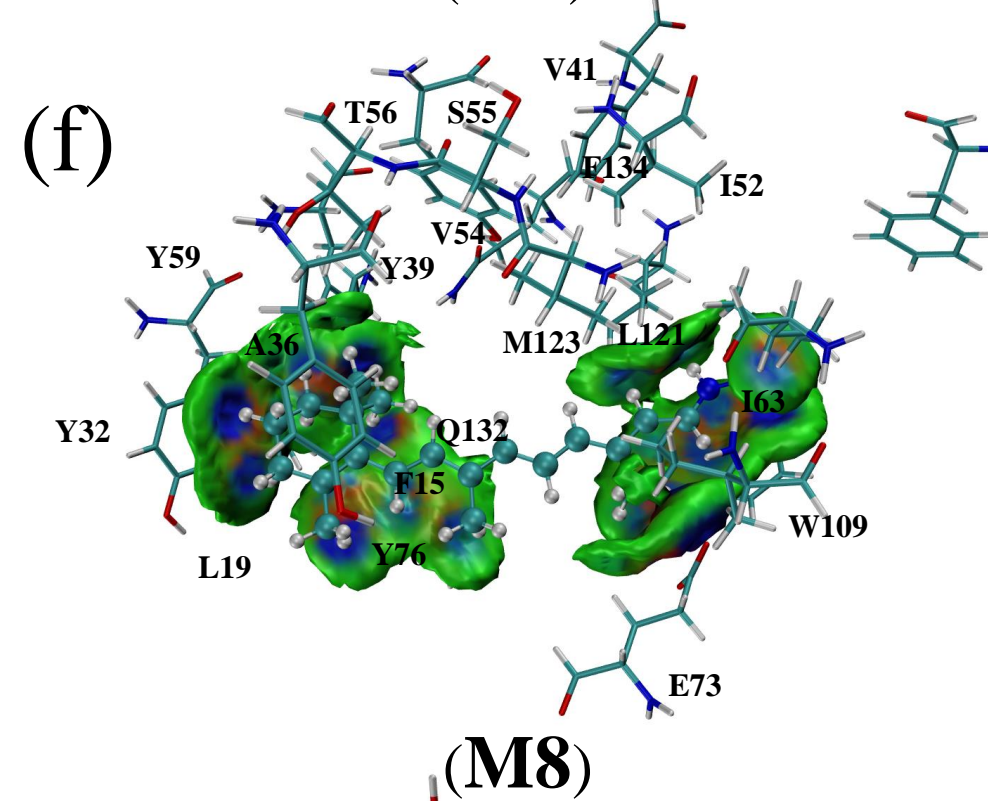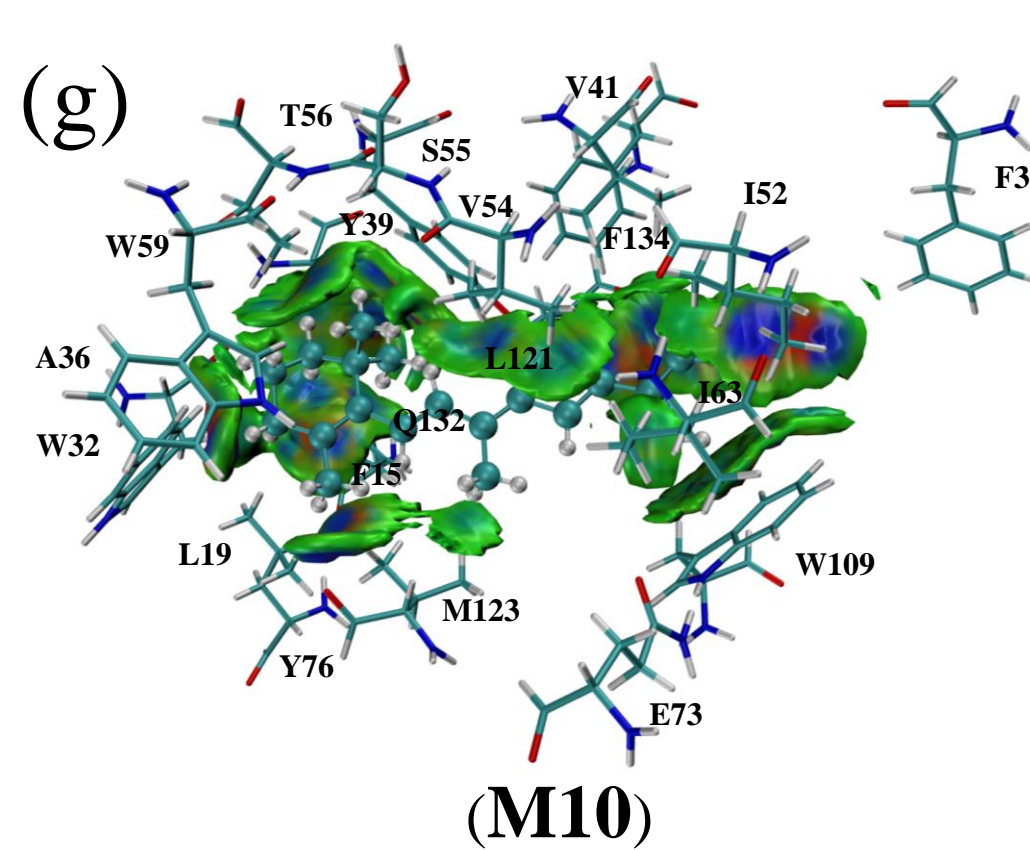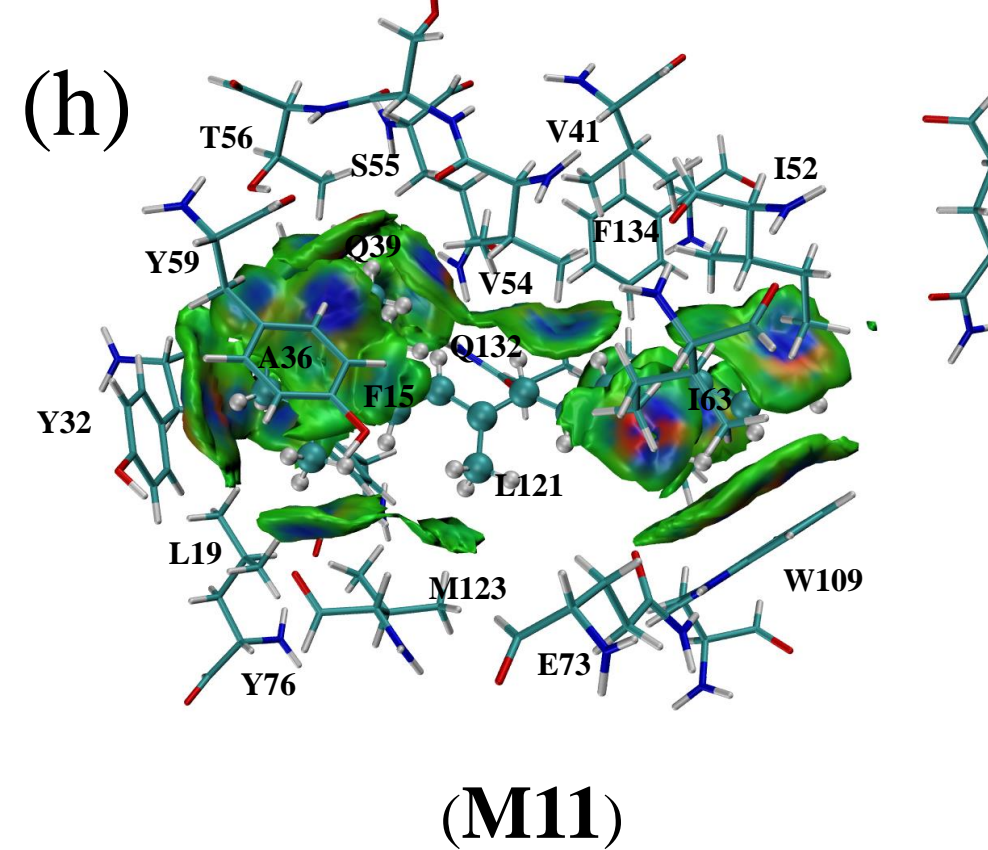

Supplement: d4cp02970d4.pdf [file d4cp02970d4.pdf]
